# Supplementary material
Source: publisher figshare collection journal article supplement (https://acs.figshare.com/ndownloader/files/4263760)
Supplement: Supplementary file 1 [file 4263760]

Data of related compounds:

1. Compound 1 ( $^1\text{H}$  NMR, IR, HPLC, ee, ESI-MS)

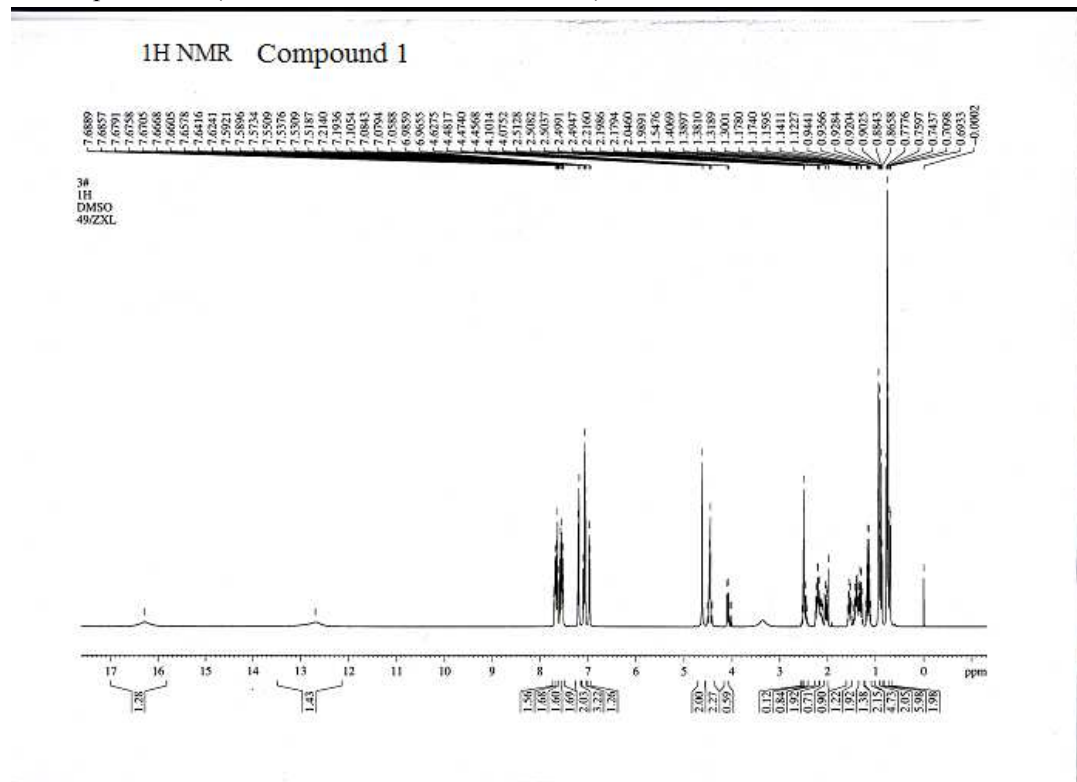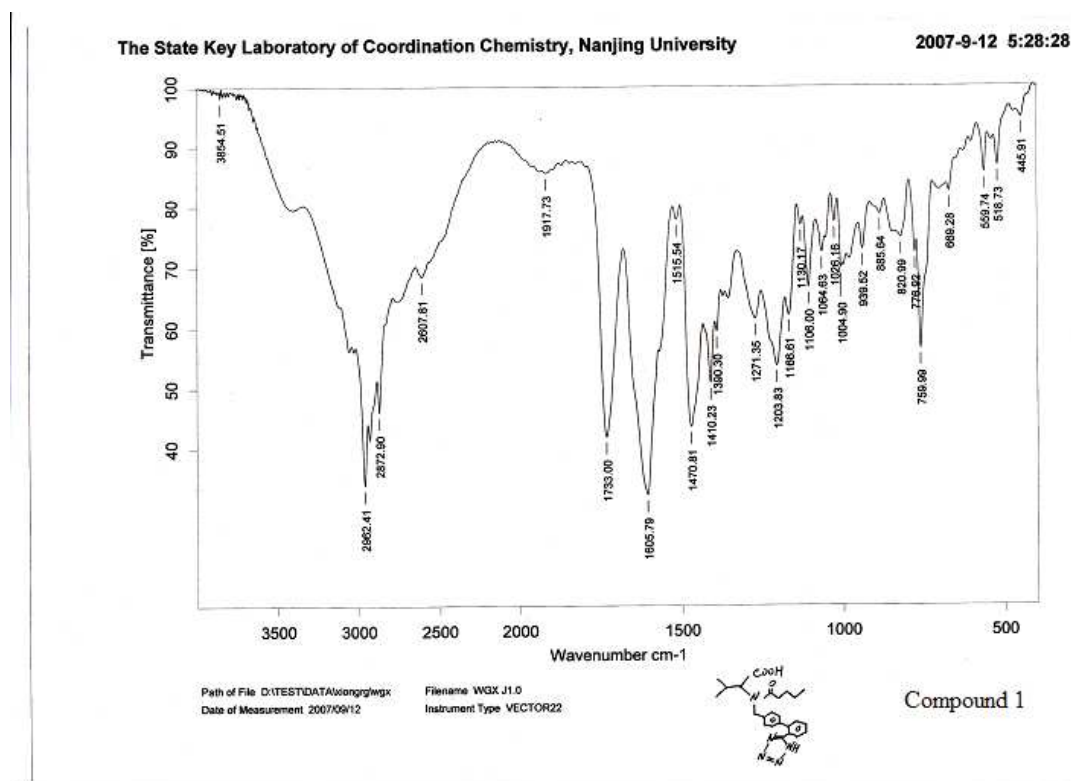

HPLC Compound 1

Valsartan

打印时间: 2007年9月19日, 10时27分  
进样时间: 2007年9月19日, 10时18分

打开的谱图文件: D:\何翠翠\070919\wgx-918.hw

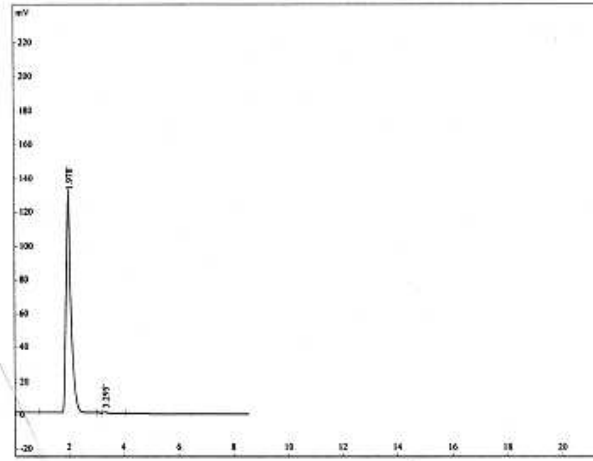

| 序号 | 保留时间  | 名称 | 峰面积%   | 峰面积     |
|----|-------|----|--------|---------|
| 1  | 1.978 |    | 99.62  | 1654121 |
| 2  | 3.295 |    | 0.3728 | 6190    |
| 总计 |       |    | 100    | 1660311 |

Project Name: sun2010  
Reported by User: Breeze OAS (Breeze)

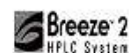

### SAMPLE INFORMATION

|                   |               |                  |                          |
|-------------------|---------------|------------------|--------------------------|
| Sample Name:      | 3#            | Acquired By:     | Breeze                   |
| Sample Type:      | Unknown       | Date Acquired:   | 5/5/2011 12:08:31 PM CST |
| Vial:             | 3             | Acq. Method:     | pro12 08 220             |
| Injection #:      | 1             | Date Processed:  | 5/5/2011 2:27:56 PM CST  |
| Injection Volume: | 10.00 ul      | Channel Name:    | W2489 ChA                |
| Run Time:         | 30.00 Minutes | Channel Desc:    | W2489 ChA 254nm          |
|                   |               | Sample Set Name: | 20110505OD               |

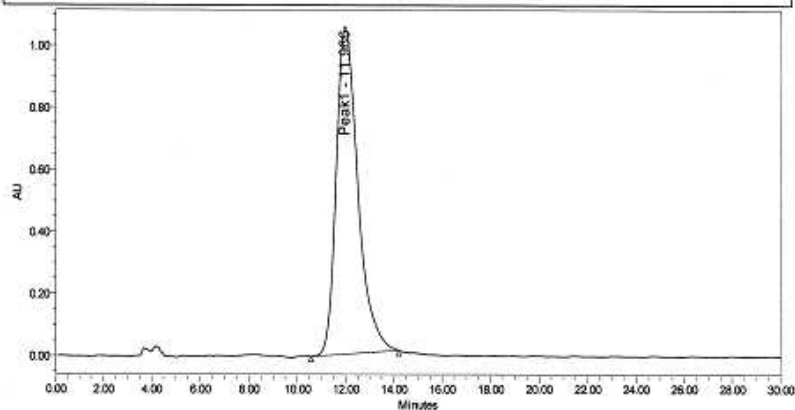

| Peak Name | RT (min) | Area (μV*sec) | % Area | Height (μV) | % Height |
|-----------|----------|---------------|--------|-------------|----------|
| 1 Peak1   | 11.956   | 65896487      | 100.00 | 1055254     | 100.00   |

Report Method: System Performance Report  
Page: 1 of 1

Printed: 5/5/2011  
2:28:02 PM PRC

HPLC Conditions for Enantiomer Purity of Valsartan are listed below.

Instrument: Water, Breeze 2

Column: Chiralcel OD-H

Detection: UV, 220 nm

Flow: 0.8 mL/min

Injection volume: 10 μL

Run time: 30 min

Mobile phase: the ratio of n-hexane and isopropyl alcohol is 850:150

Retention time of valsartan: ~12 min

The enantiomeric purity of the crystallized Valsartan prepared in our experiments is nearly 100%. The peak occurred in 4 min can be attributed to the solvent peak in dead time.

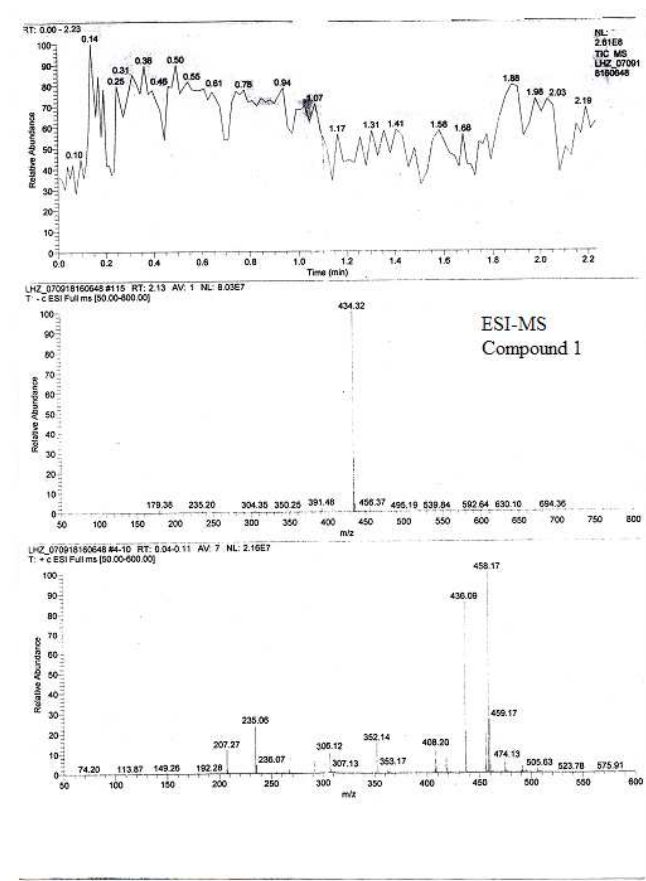

## 2. Recovered tri-*n*-butyltin chloride (MS, IR, GC)

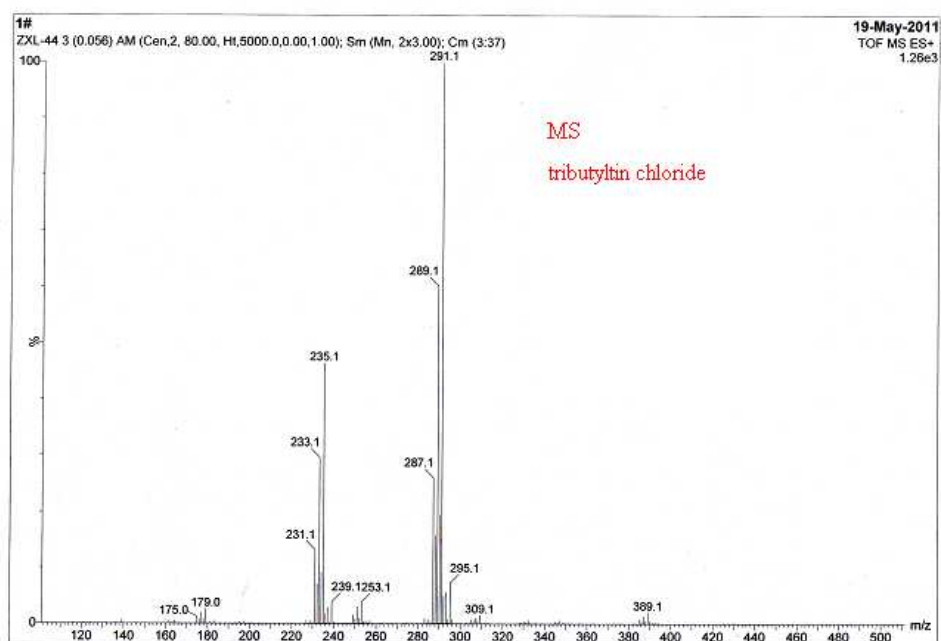

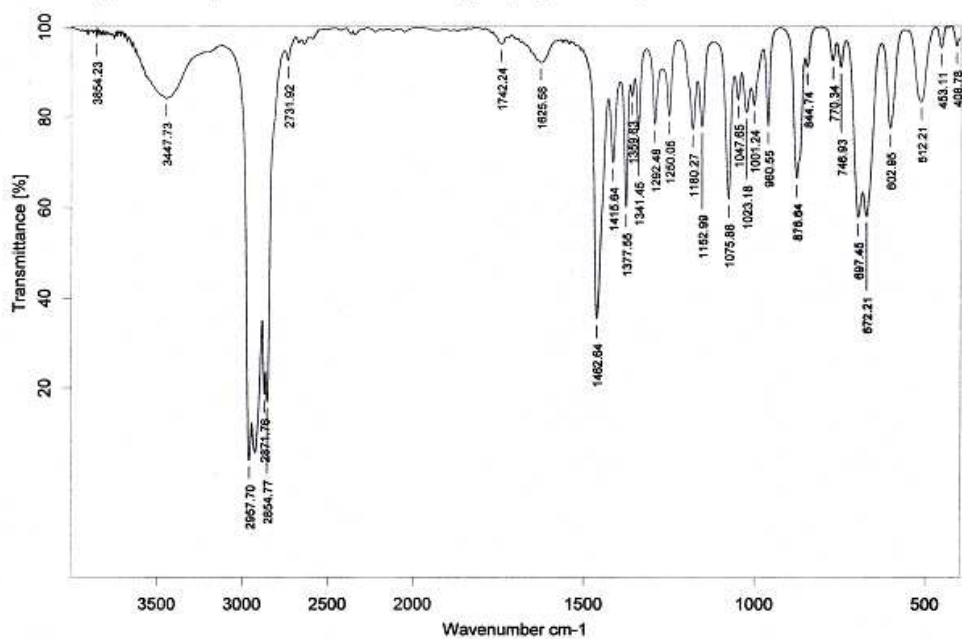

Path of File D:\Search\TESTDATA\Xiong RG\Filename wgr-9-25-2.0

Date of Measurement 2007/09/25

Instrument Type VECTOR22

t-Bu<sub>3</sub>SnClF → Cl t-Bu<sub>3</sub>SnCl

样品名称: wangl

操作者 : y y z 序列号 : 1  
 仪器 : 仪器 2 位置 : 样品瓶 202  
 进样日期 : 2011-3-17 11:00:56 进样次数 : 1  
 进样量 : 1 μl  
 采集方法 : C:\CHEM32\2\DATA\DEF\_GC 2011-03-17 10-59-44\分流-FID 2 YU.M  
 最后修改 : 2011-3-17 10:59:44 : y y z  
 分析方法 : C:\CHEM32\2\METHODS\分流-FID 2 YU.M  
 最后修改 : 2011-4-2 10:58:07 : y y z  
 (调用后修改)  
 方法信息 : 分流进样口-分流yu0902-FID

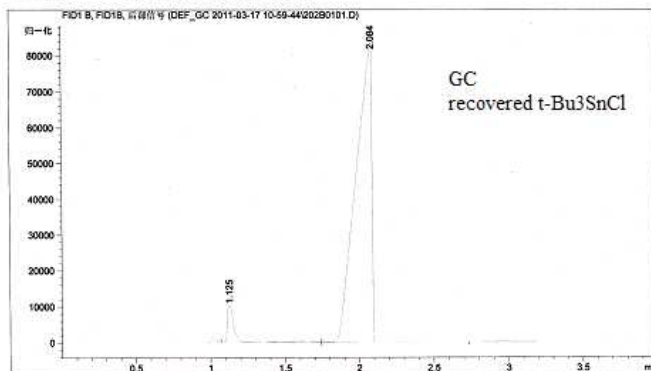

## 面积百分比报告

排序 : 信号  
 乘积因子 : 1.0000  
 稀释因子 : 1.0000  
 内标中不使用乘积因子和稀释因子

信号 1: FID1 B, FID1B, 后部信号

| 峰 # | 保留时间 [min] | 类型   | 峰宽 [min] | 峰面积 [pA*s] | 峰高 [pA]   | 峰面积 %    |
|-----|------------|------|----------|------------|-----------|----------|
| 1   | 1.125      | VV S | 0.0466   | 3.02022e4  | 1.01810e4 | 4.74003  |
| 2   | 2.084      | VB S | 0.0924   | 6.06971e5  | 8.29536e4 | 95.25997 |

总量 : 6.37173e5 9.31346e4

\*\*\* 报告结束 \*\*\*

### 3. tri-*n*-butyltin fluoride (MS, IR)

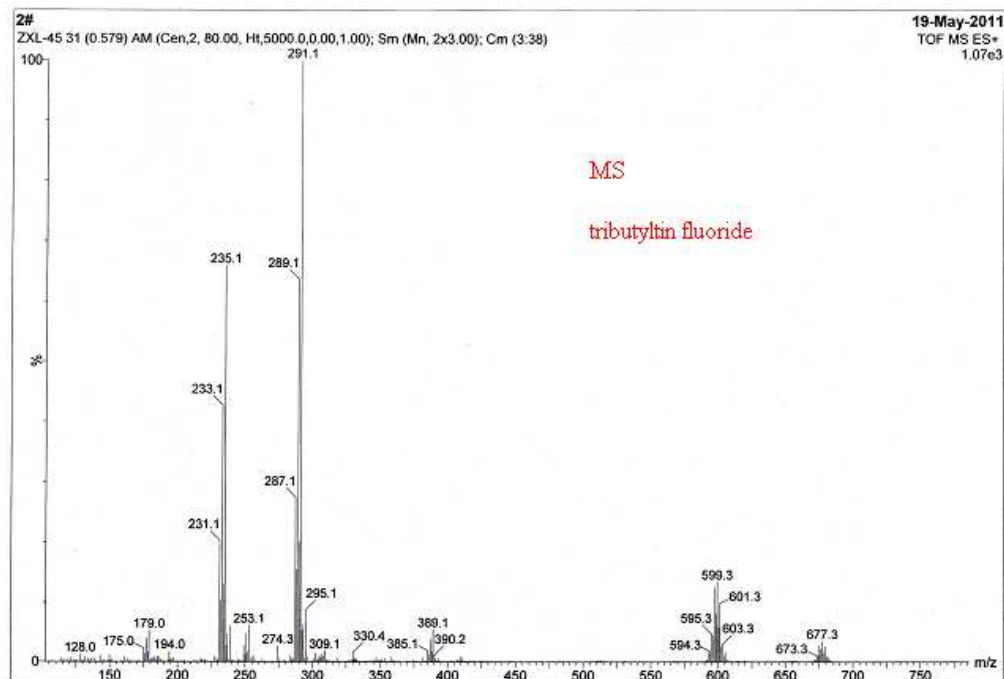

The State Key Laboratory of Coordination Chemistry, Nanjing University

2007-9-26 10:14:09

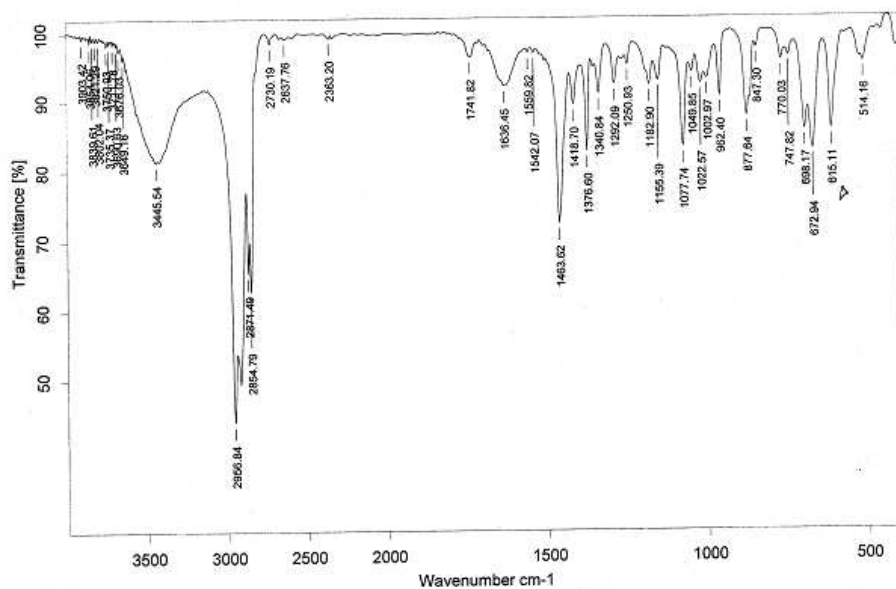

Path of File: D:\Search\TEST\DATA\Xiong RG\w\B5nF.0  
Date of Measurement: 2007/09/26  
Instrument Type: VECTOR22

$n\text{-Bu}_3\text{SnF}$

#### 4. Compound 3 (IR)

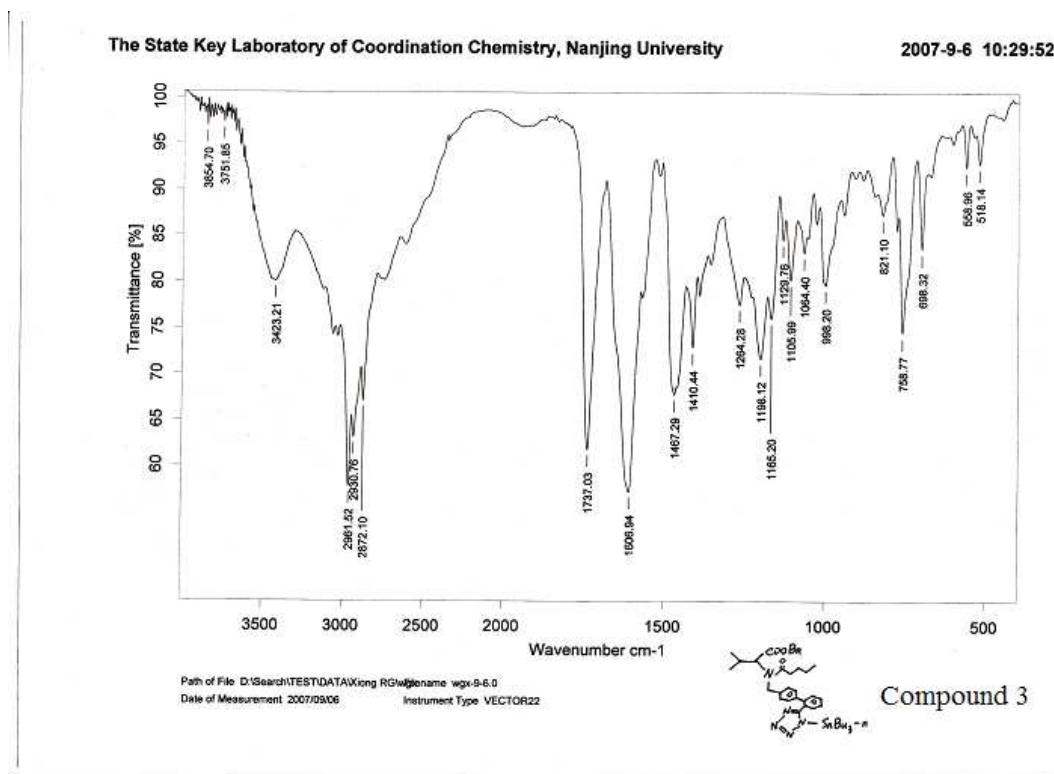

## 5. Compound 2 ( MS, IR)

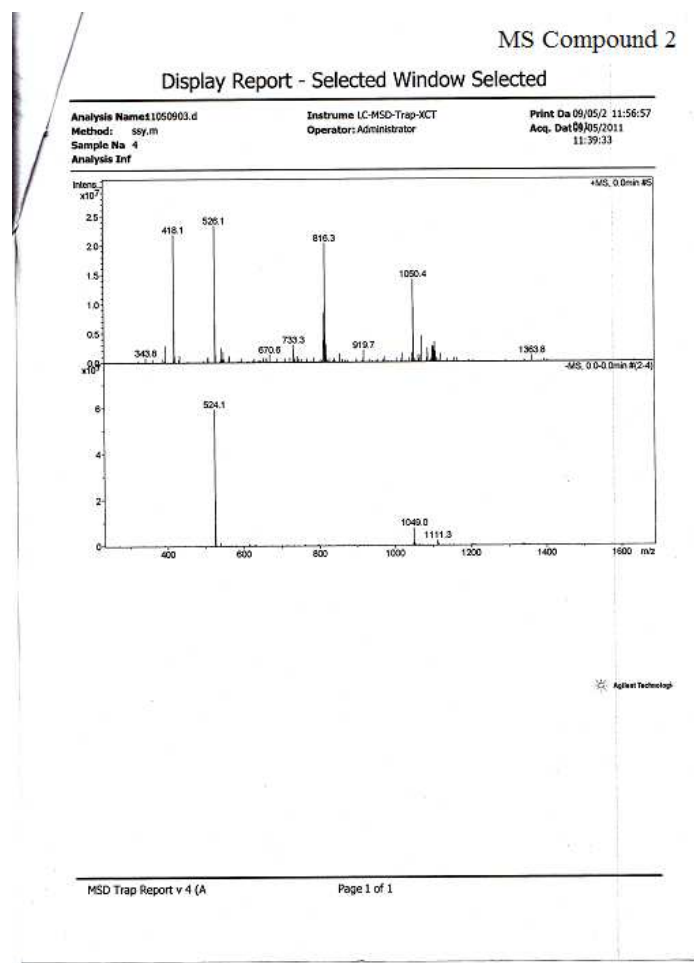

The State Key Laboratory of Coordination Chemistry, Nanjing University

2007-9-12 5:07:58

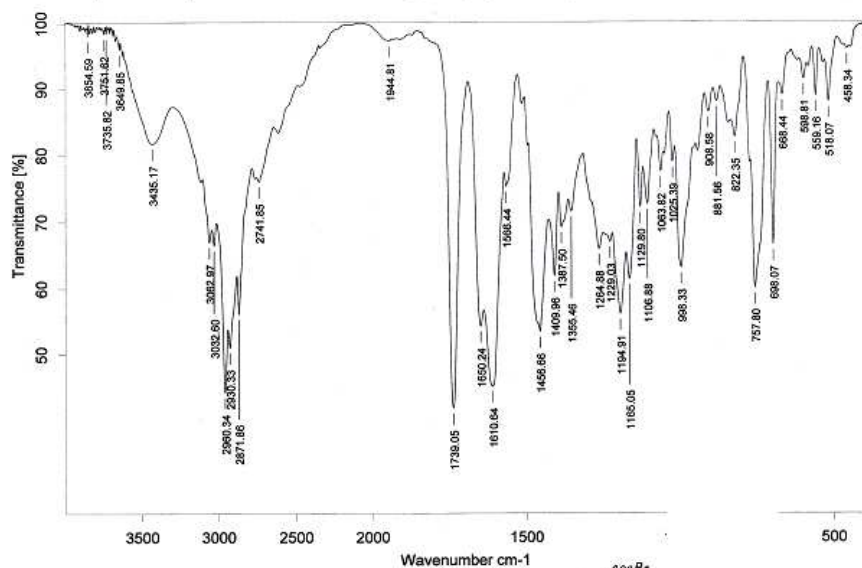

Path of File: D:\TEST\DATA\Xiong\wgx  
Date of Measurement: 2007/09/12

Filename: WGXI1.0  
Instrument Type: VECTOR22

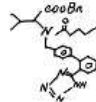

Compound 2
